# Supplementary material for: Immunophenotype of Gastric Tumors Unveils a Pleiotropic Role of Regulatory T Cells in Tumor Development
Source: MDPI journal article supplement (doi:10.3390/cancers13030421), 2021-01-23
Supplement: s1 [file s1]

## **SUPPLEMENTARY TABLES**

**Article title:** Immunophenotype of gastric tumours unveils a pleiotropic role of regulatory T cells in tumour development

**Journal name:** Cancers

**Authors:** Sara Rocha, Afonso Basto, Marieke E Ijsselsteijn, Sara P Teles, Maria M Azevedo, Gilza Gonçalves, Irene Gullo, Gabriela M Almeida, Joaquín J Maqueda, Marta Oliveira, Fátima Carneiro, João T Barata, Luís Graça, Noel FCC de Miranda, Joana Carvalho and Carla Oliveira

**Corresponding author:**

Carla Oliveira

*Group Coordinator, Expression Regulation in Cancer Group, i3S and Ipatimup - Institute of Molecular Pathology and Immunology, University of Porto*

*Professor of Oncobiology at the Faculty of Medicine of Porto University, Portugal*

*E-mail: carlaol@ipatimup.pt*

**Supplementary Table 1.** Description of patient information included in the analysed GC cohort

| Patient gender                            |          |
|-------------------------------------------|----------|
| Female                                    | 37 (45%) |
| Male                                      | 45 (55%) |
| Age of onset                              |          |
| Mean                                      | 70       |
| Standard deviation                        | 12       |
| Histological type (Laurén Classification) |          |
| Intestinal                                | 41 (50%) |
| Diffuse                                   | 15 (18%) |
| Mixed                                     | 11 (13%) |
| Indeterminate                             | 15 (18%) |
| TNM Staging                               |          |
| I                                         | 8 (10%)  |
| II                                        | 13 (16%) |
| III                                       | 42 (51%) |
| IV                                        | 19 (23%) |
| pT stage                                  |          |
| T1b                                       | 3 (4%)   |
| T2                                        | 8 (10%)  |
| T3                                        | 36 (44%) |
| T4a                                       | 31 (38%) |
| T4b                                       | 4 (5%)   |
| N Stage                                   |          |
| N0                                        | 16 (20%) |
| N1                                        | 11 (13%) |
| N2                                        | 16 (20%) |
| N3a                                       | 24 (29%) |
| N3b                                       | 15 (18%) |
| M stage                                   |          |
| M0                                        | 63 (77%) |
| M1                                        | 19 (23%) |
| Lymphatic Invasion                        |          |
| Absent                                    | 8 (10%)  |
| Present                                   | 74 (90%) |
| Vascular Invasion                         |          |
| Absent                                    | 18 (22%) |
| Present                                   | 64 (78%) |
| Perineural Invasion                       |          |
| Absent                                    | 26 (32%) |
| Present                                   | 56 (68%) |
| Microsatellite Instability                |          |
| MSS                                       | 57 (70%) |
| MSI                                       | 25 (30%) |

**Supplementary Table 2.** Detailed description of antibodies

| Application               | Target              | Clone         | Dilution | Species | Isotype | Fluorochrome | Supplier                                               | Detection method      |
|---------------------------|---------------------|---------------|----------|---------|---------|--------------|--------------------------------------------------------|-----------------------|
| <i>Immunofluorescence</i> | PD1                 | D4W2J         | 1:2000   | Rabbit  | IgG     | Opal 520     | Cell Signaling Technology                              | Opal detection        |
|                           | FoxP3               | 236A/E7       | 1:25     | Mouse   | IgG1    | CF633        | Thermo Fisher Scientific                               | Indirect detection    |
|                           | CD8                 | 4B11          | 1:50     | Mouse   | IgG2b   | AF647        | Leica biosystems                                       | Indirect detection    |
|                           | CD103               | EPR4166 2     | 1:100    | Rabbit  | IgG     | AF680        | Abcam                                                  | Indirect detection    |
|                           | CD3                 | EP447E        | 1:50     | Rabbit  | IgG     | AF594        | Abcam                                                  | Conjugated antibodies |
|                           | Cytokeratin         | AE1/AE3 + C11 | 1:50     | Mouse   | IgG1    | AF546        | Thermo Fisher Scientific and Cell Signaling Technology | Conjugated antibodies |
| <i>Flow Cytometry</i>     | CD3                 | OKT3          | 1:400    | Mouse   | IgG2a   | PE           | Thermo Fisher Scientific                               | Conjugated antibodies |
|                           | CD4                 | OKT4          | 1:400    | Mouse   | IgG2b   | FITC         | Thermo Fisher Scientific                               | Conjugated antibodies |
|                           | CD127               | eBioRDR5      | 1:50     | Mouse   | IgG1    | PE/Cy5       | Thermo Fisher Scientific                               | Conjugated antibodies |
|                           | CD25                | BC96          | 1:25     | Mouse   | IgG1    | PE/Cy7       | Thermo Fisher Scientific                               | Conjugated antibodies |
|                           | FoxP3               | PCH101        | 1:15     | Rat     | IgG2a   | APC          | Thermo Fisher Scientific                               | Conjugated antibodies |
| <i>Western Blotting</i>   | phospho-Stat3       | Tyr705, D3A7  | 1:1000   | Rabbit  | IgG     | NA           | Cell Signaling Technology                              | Indirect detection    |
|                           | Stat3               | 124H6         | 1:1000   | Mouse   | IgG2a   | NA           | Cell Signaling Technology                              | Indirect detection    |
|                           | phospho-Akt         | Ser473, D9E   | 1:1000   | Rabbit  | IgG     | NA           | Cell Signaling Technology                              | Indirect detection    |
|                           | Akt                 | NA            | 1:1000   | Rabbit  | NA      | NA           | Cell Signaling Technology                              | Indirect detection    |
|                           | phospho-p44/42 MAPK | Thr202/Tyr204 | 1:1000   | Rabbit  | NA      | NA           | Cell Signaling Technology                              | Indirect detection    |
|                           | p44/42 MAPK         | NA            | 1:1000   | Rabbit  | NA      | NA           | Cell Signaling Technology                              | Indirect detection    |
|                           | GAPDH               | 1E6D9         | 1:5000   | Mouse   | IgG2b   | NA           | ProteinTech                                            | Indirect detection    |

NA: Not applicable
